# Supplementary material for: Reversible control of magnetism: on the conversion of hydrated FeF3 with Li to Fe and LiF
Source: Royal Society of Chemistry journal article supplement (doi:10.1039/c9ta08928d), 2019-01-01
Supplement: c9ta08928d1.pdf [file c9ta08928d1.pdf]

## Reversible control of magnetism: On the conversion of hydrated $\text{FeF}_3$ with Li to Fe and $\text{LiF}$

Ruby Singh<sup>1,2</sup>, Ralf Witte<sup>1</sup>, Xiaoke Mu<sup>1</sup>, Torsten Brezesinski<sup>1</sup>, Horst Hahn<sup>1,2</sup>, Robert Kruk<sup>1</sup>, Ben Breitung<sup>1,3</sup>

1 Institute of Nanotechnology, Karlsruhe Institute of Technology (KIT), 76344 Eggenstein-Leopoldshafen, Germany

2 Joint Research Laboratory Nanomaterials, Technische Universität Darmstadt & Karlsruhe Institute of Technology (KIT), 64287 Darmstadt, Germany

3 Karlsruhe Nano-Micro Facility (KNMF), Karlsruhe Institute of Technology (KIT), 76344 Eggenstein-Leopoldshafen, Germany

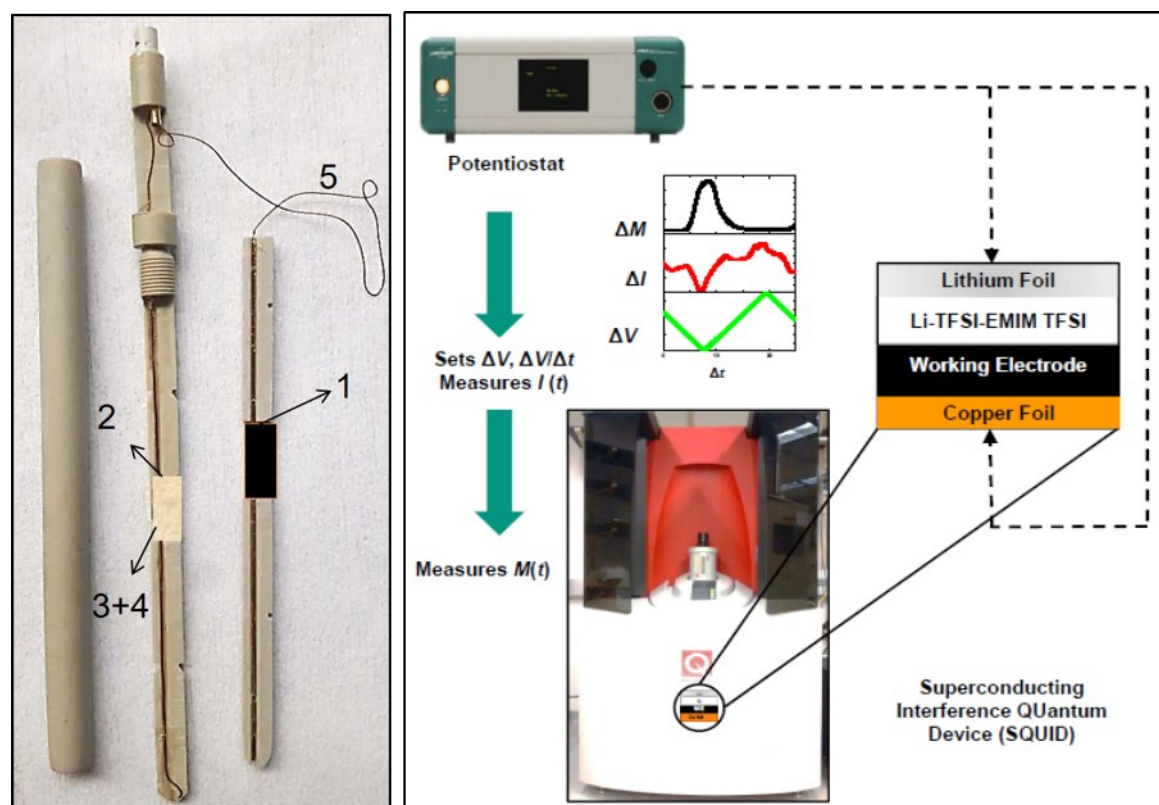

Figure S1: Electrochemical tuning cell and measurement setup

1: Working electrode

2: Counter electrode

3+4: Separator soaked with electrolyte

5: Connection to Potentiostat

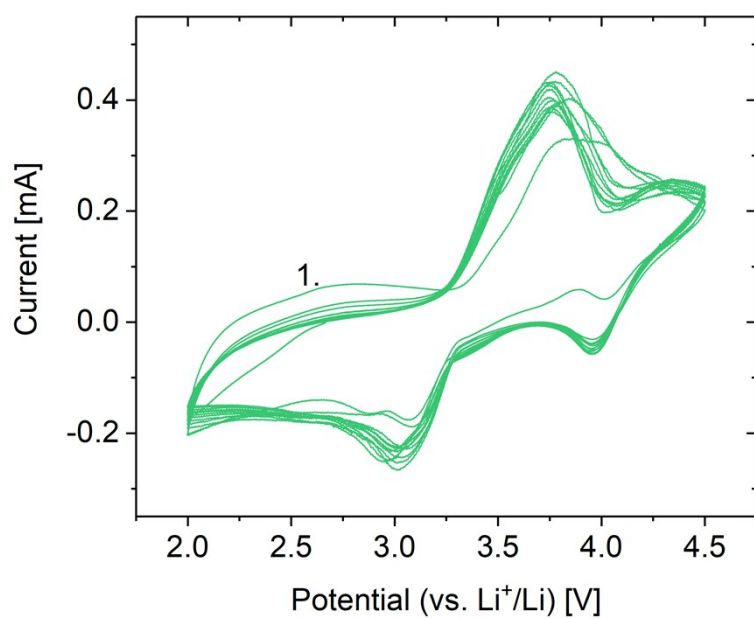

Figure S2: Cyclic voltammograms of the first 13 cycles.

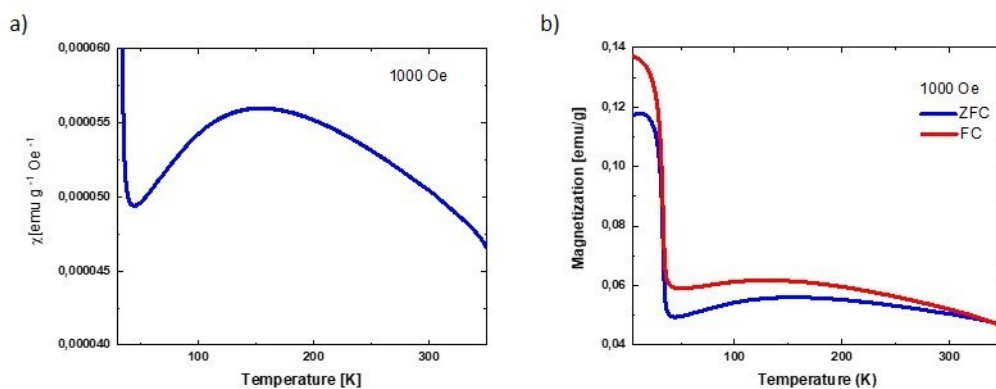

Figure S3: a) Zero-field-cooled magnetic susceptibility of  $\text{FeF}_3 \cdot 3\text{H}_2\text{O}$  as function of temperature measured with an applied magnetic field of 1000 Oe. b) Zero-field-cooled and field-cooled curve with an applied magnetic field of 1000 Oe.
